# Supplementary material
Source: Springer Nature journal article supplement (https://www.springermedizin.de/resource/supplementary/12957_2011_951_MOESM1_ESM.pdf/9561898)

Figure 1

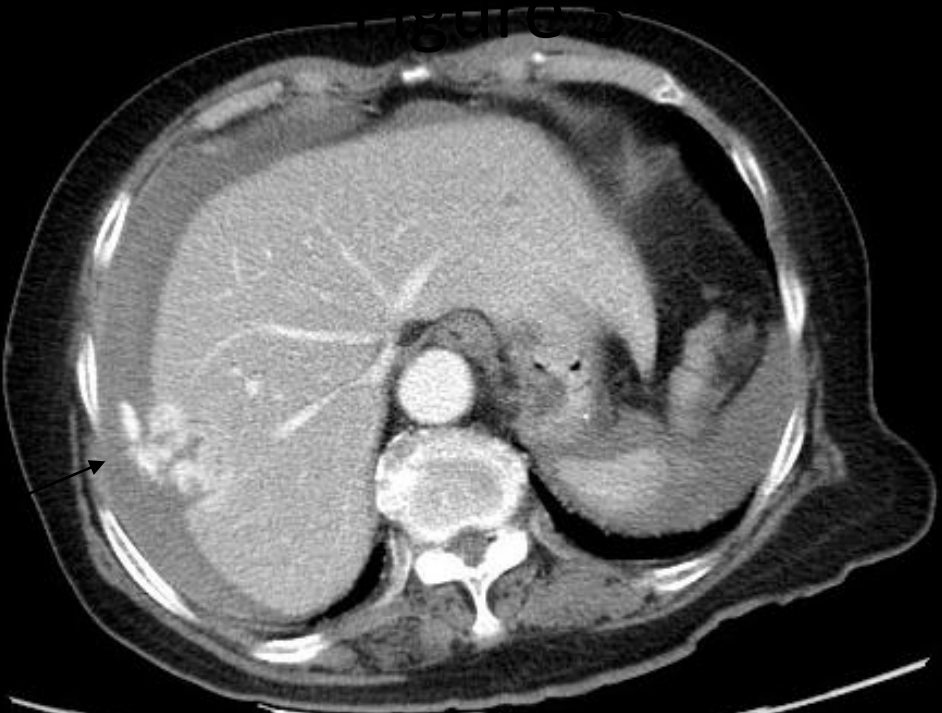

Supplement: MOESM1 [file 9561898]
